# Supplementary material for: Redox reactions of a pyrazine-bridged RuIII(edta) binuclear complex: spectrochemical, spectroelectrochemical and theoretical studies
Source: Royal Society of Chemistry journal article supplement (doi:10.1039/d3cp04438f), 2023-12-12
Supplement: d3cp04438f1.pdf [file d3cp04438f1.pdf]

## Redox reactions of pyrazine bridged Ru<sup>III</sup>(edta) binuclear complex: spectral, electrochemical and spectro-electrochemical studies

Olga Impert,<sup>\*a</sup> Maciej Witwicki,<sup>b</sup> Urszula K. Komarnicka,<sup>b</sup> Alina Bieńko,<sup>b</sup> Alessandro Niorettini,<sup>c</sup> and Debabrata Chatterjee<sup>\*d</sup>

<sup>a</sup> Faculty of Chemistry, Nicolaus Copernicus University in Toruń, Gagarina 7, 87-100 Toruń, Poland E-mail: [oiimpert@umk.pl](mailto:oiimpert@umk.pl)

<sup>b</sup> Faculty of Chemistry, University of Wrocław, Joliot-Curie 14, 50-383 Wrocław, Poland

<sup>c</sup> Department of Chemical, Pharmaceuticals and Agricultural Science, University of Ferrara, Ferrara 44121, Italy

<sup>d</sup> Vice-Chancellor's Research Group, Zoology Department, University of Burdwan, Burdwan-713104, India. E-mail: [dchat57@hotmail.com](mailto:dchat57@hotmail.com)

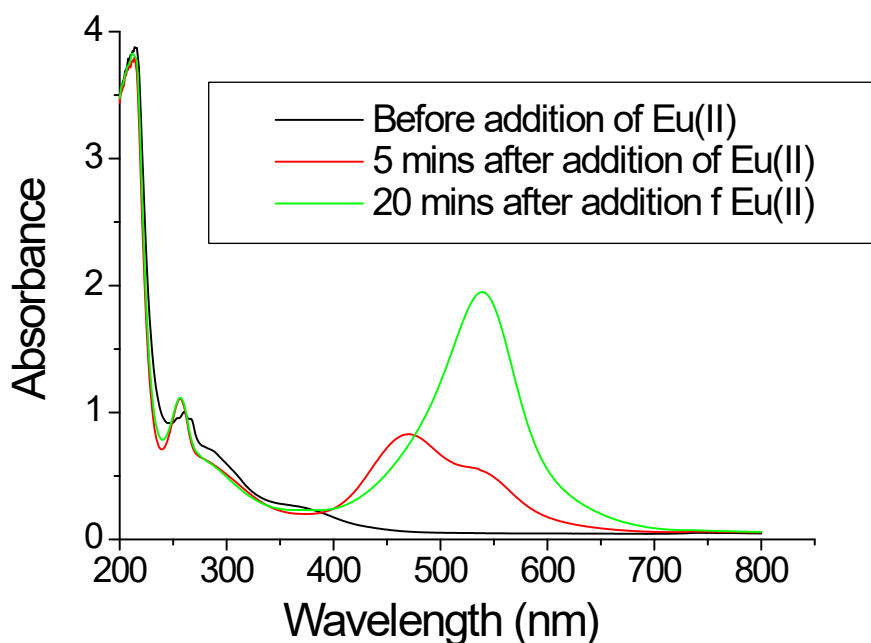

**Fig. S1** Spectral changes that occurred during the reduction of  $[(\text{edta})\text{Ru}^{\text{III}}\text{pzRu}^{\text{III}}(\text{edta})]^{2-}$  (0.1 mM) with  $\text{Eu}^{\text{II}}$  (0.4 mM) at room temperature. pH = 6.0 (acetate buffer)

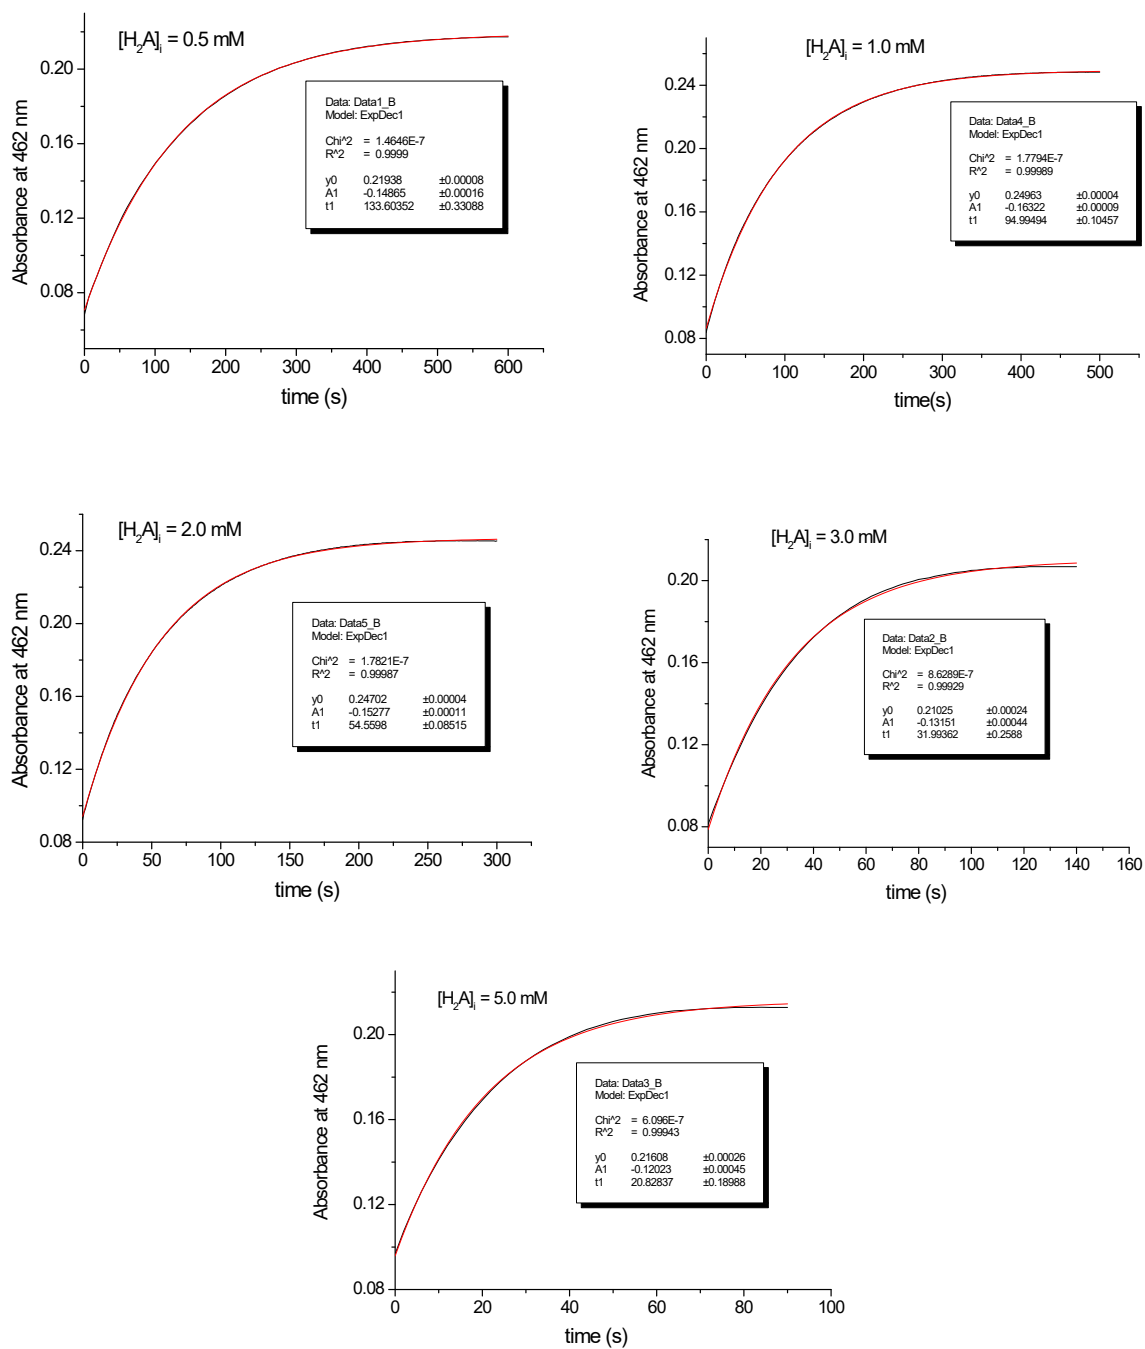

**Fig. S2** Time versus absorbance plot (growth recorded at 462 nm) pertaining to the reduction of Ru<sup>III</sup>-Ru<sup>III</sup> to Ru<sup>II</sup>-Ru<sup>III</sup> as a function of ascorbic acid concentration at 25 °C and pH 6.0.  $[Ru^{III}-Ru^{III}] = 0.05$  mM

## S1 Magnetic moment measurements studies

Magnetic moment measurements studies were performed using the SQUID magnetometer (MPMS, Quantum Design). The solution of Ru<sup>III</sup>-Ru<sup>III</sup> was electrolyzed in a quartz tube under argon. After electrolysis the tube containing the electrolyzed solution tightly under argon was transferred to the pre-calibrated (with the empty tube and with the solvent) magnetometer for measurements. The susceptibility data were acquired at room temperature, corrected to the background signals and underlying diamagnetism<sup>1</sup>, and transformed to the effective magnetic moment. The value of magnetic moment at room temperature for Ru(III) -Ru(III) units is 2.59  $\mu\text{B}$  confirm the presence of two non-pair electron in such system. After the one electron reduction process the observed value of magnetic moment is 1.69  $\mu\text{B}$  correspond to one non-pair electron in Ru(II) -Ru(III) species and finally the measurement procedure shown negative value of magnetization adequate to diamagnetic configuration of Ru(II) – Ru(II) unit.

**Reference 1** G. A. Bain and J. F. Berry, *J. Chem. Educ.*, 2008, **85**, 532–536

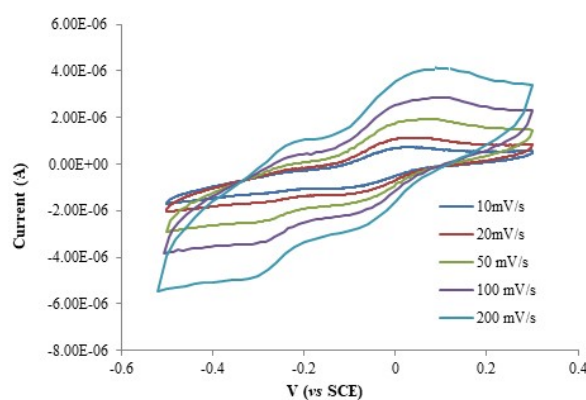

**\*Fig. S3** Cyclic voltammograms of  $[(\text{edta})\text{Ru}^{\text{III}}\text{pzRu}^{\text{III}}(\text{edta})]^{2-}$  ( $\text{Ru}^{\text{III}}\text{-Ru}^{\text{III}}$ ) at different scan rate.  $[\text{Ru}^{\text{III}}\text{-Ru}^{\text{III}}] = 0.1\text{mM}$ , pH 6.0 (acetate buffer),  $[\text{NaClO}_4] = 0.1\text{M}$ .

\*Electrochemical analysis was performed with an Autolab PGSTAT302N potentiostat-galvanostat, a single compartment gastight electrochemical cell was equipped with a glassy carbon working electrode, a platinum wire as counter and a SCE reference electrode. Electrochemical measurements were performed strictly under argon atmosphere. All the solutions were prepared using high purity demineralised Milli-Q water.

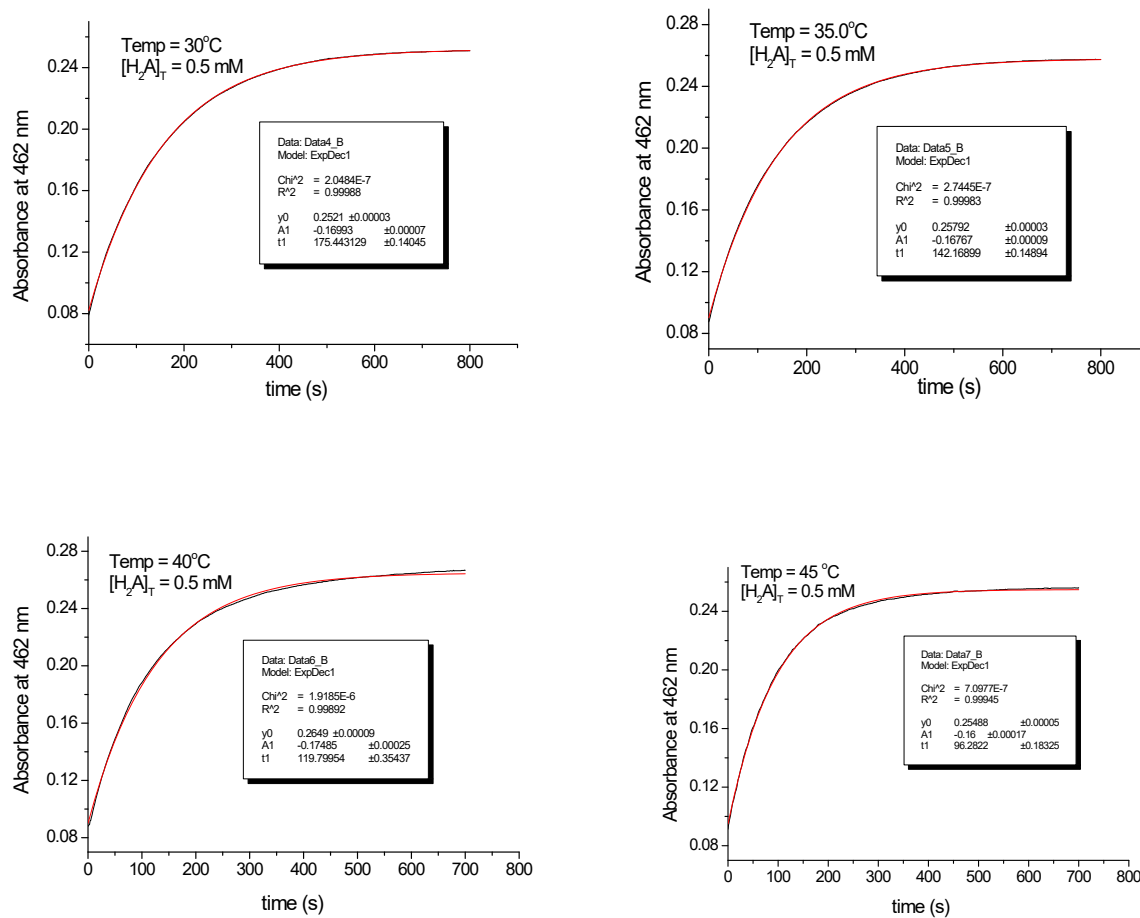

**Fig. S4** Time versus absorbance plots (growth recorded at 462 nm) pertaining to the reduction of Ru<sup>III</sup>-Ru<sup>III</sup> to Ru<sup>II</sup>-Ru<sup>III</sup> by ascorbic acid at a different temperature pH 6.0. [H<sub>2</sub>A]<sub>i</sub> = 0.5 mM [Ru<sup>III</sup>-Ru<sup>III</sup>] = 0.05mM.

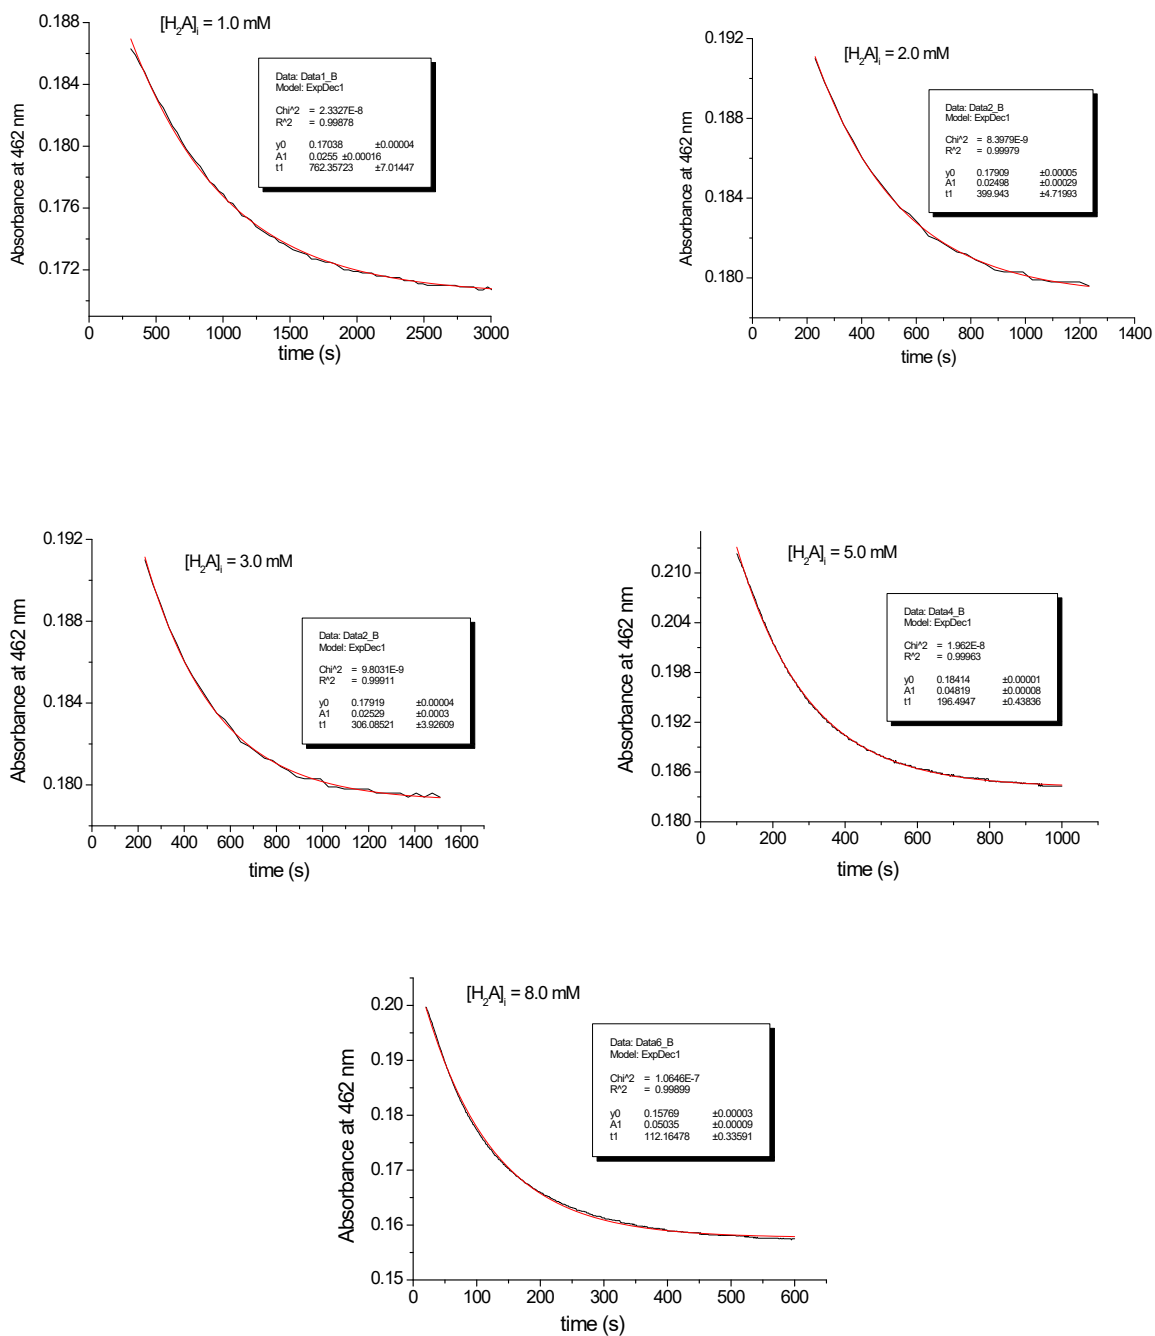

**Fig. S5** Time versus absorbance plots (decay recorded at 462 nm) pertinent to the reduction  $Ru^{II}$ - $Ru^{III}$  to  $Ru^{II}$ - $Ru^{II}$  as a function of ascorbic acid concentration at 25 °C and pH 6.0.  $[Ru^{III}$ - $Ru^{III}] = 0.05$  mM

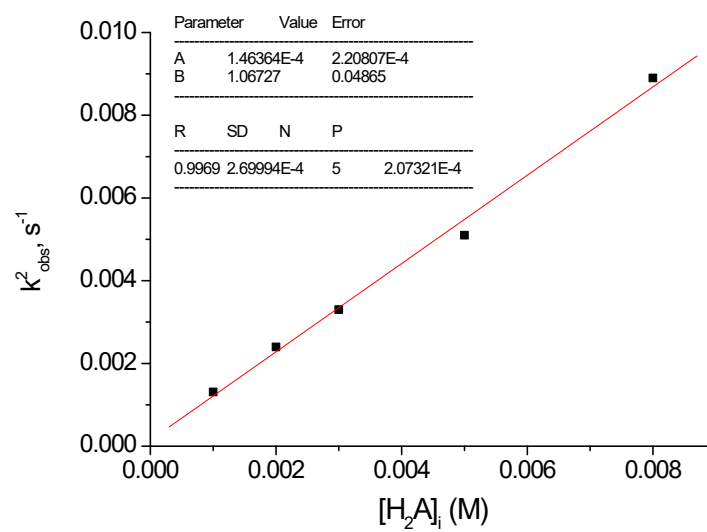

**Fig. 6** Plot of  $k_{\text{obs}}^2$  (estimated from the traces shown in Fig. S6) versus  $[\text{H}_2\text{A}]_i$  for the reduction of  $\text{Ru}^{\text{II}}\text{-Ru}^{\text{III}}$  by  $\text{H}_2\text{A}$  at 25 °C and pH 6.0.  $[\text{Ru}^{\text{III}}\text{-Ru}^{\text{II}}] = 0.05\text{mM}$

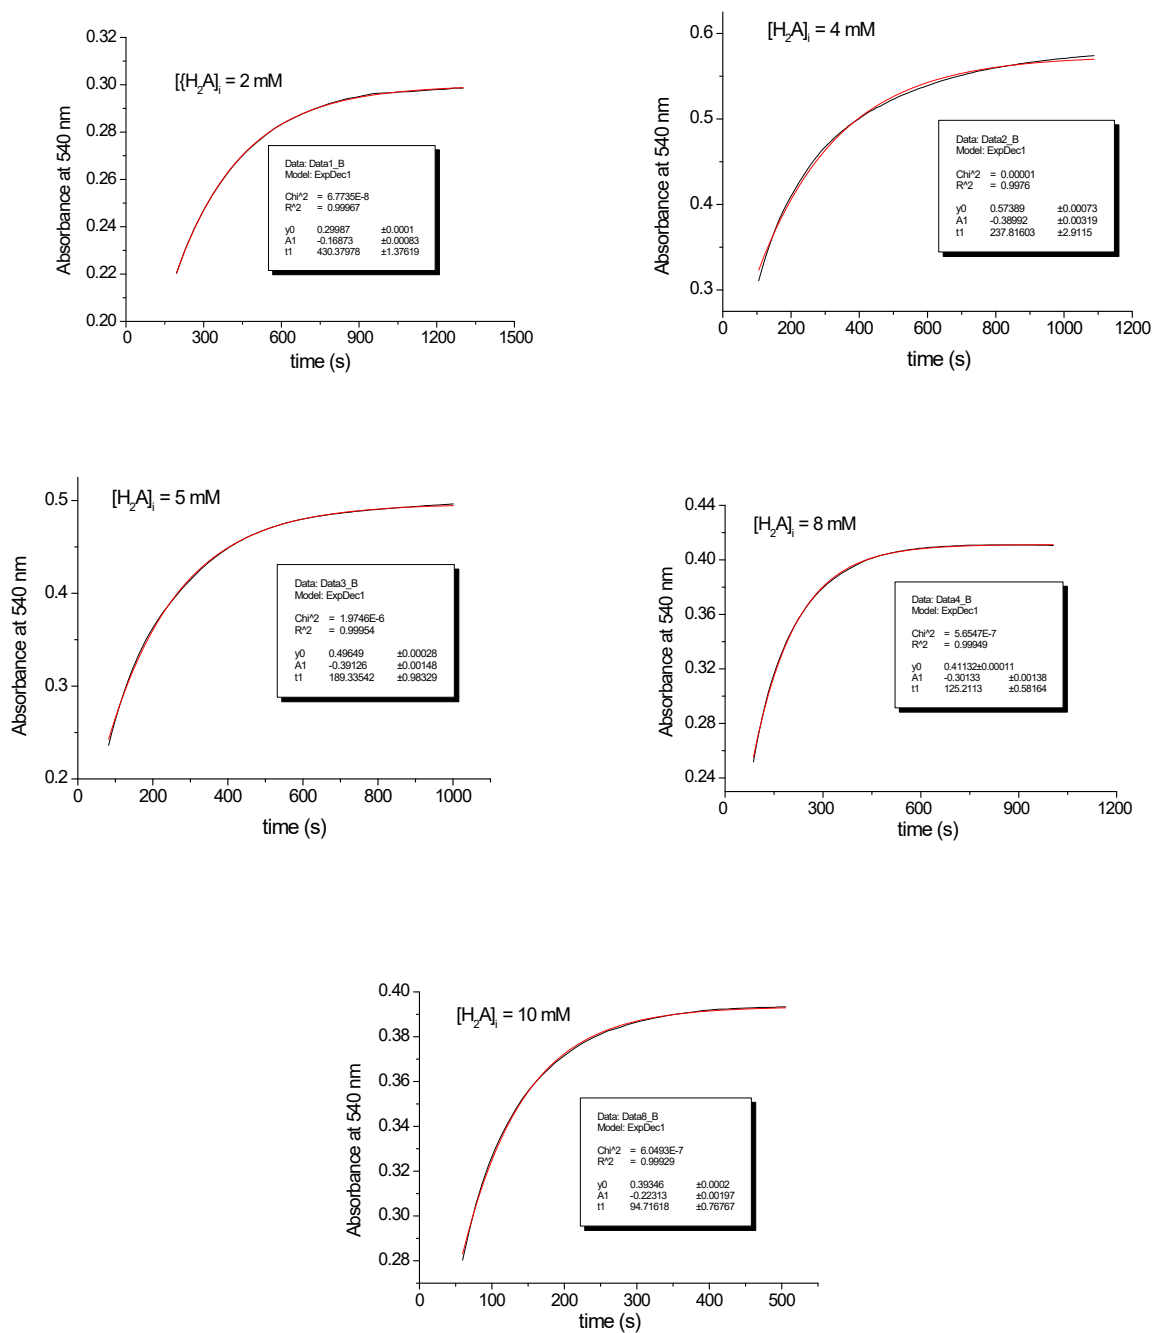

**Fig. S7** Time versus absorbance traces (growth recorded at 540 nm) pertinent to the reduction of Ru<sup>II</sup>-Ru<sup>III</sup> to Ru<sup>II</sup>-Ru<sup>II</sup> as a function of ascorbic acid concentration at 25 °C and pH 6.0. [Ru<sup>III</sup>-Ru<sup>III</sup>] = 0.05 mM

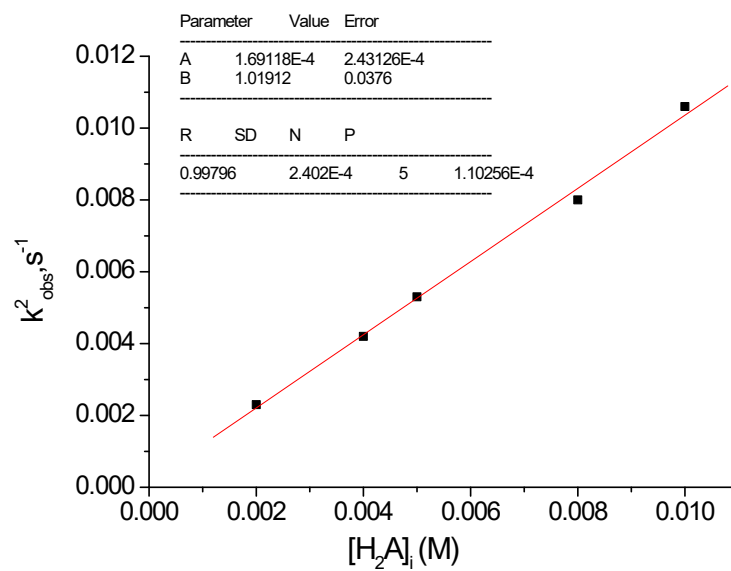

**Fig. S8** Plot of  $k_{\text{obs}}^2$  (estimated from the traces shown in Fig. S8) versus  $[\text{H}_2\text{A}]_i$  for the reduction of  $\text{Ru}^{\text{II}}\text{-Ru}^{\text{III}}$  by  $\text{H}_2\text{A}$  at 25 °C and pH 6.0.  $[\text{Ru}^{\text{III}}\text{-Ru}^{\text{III}}] = 0.05\text{mM}$



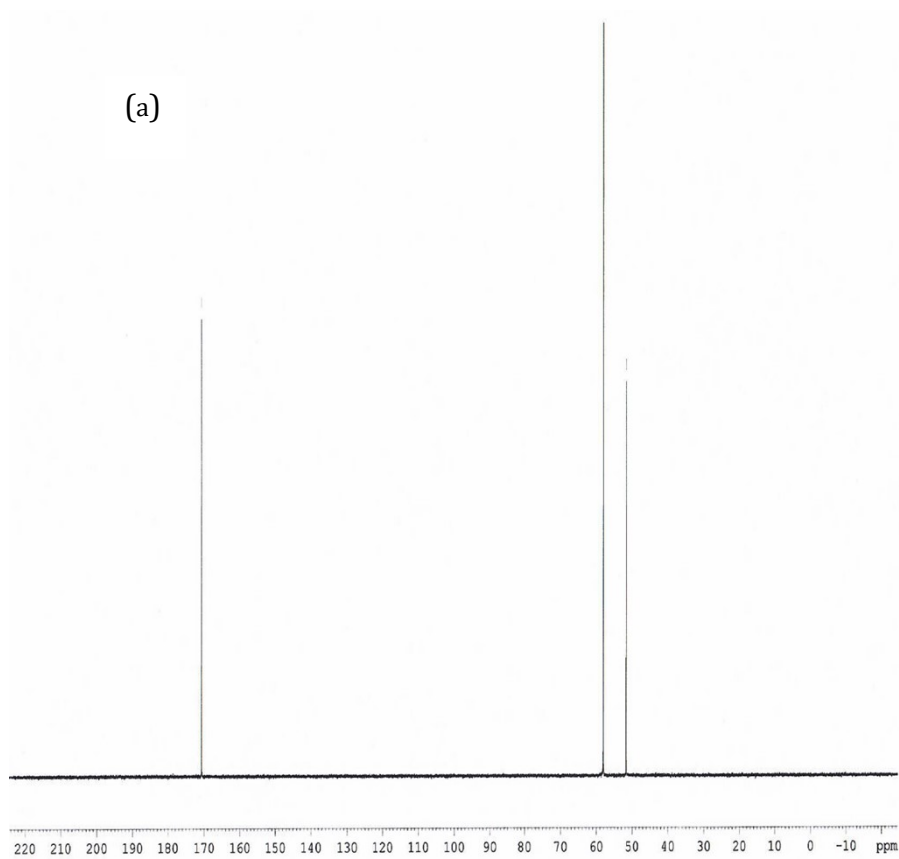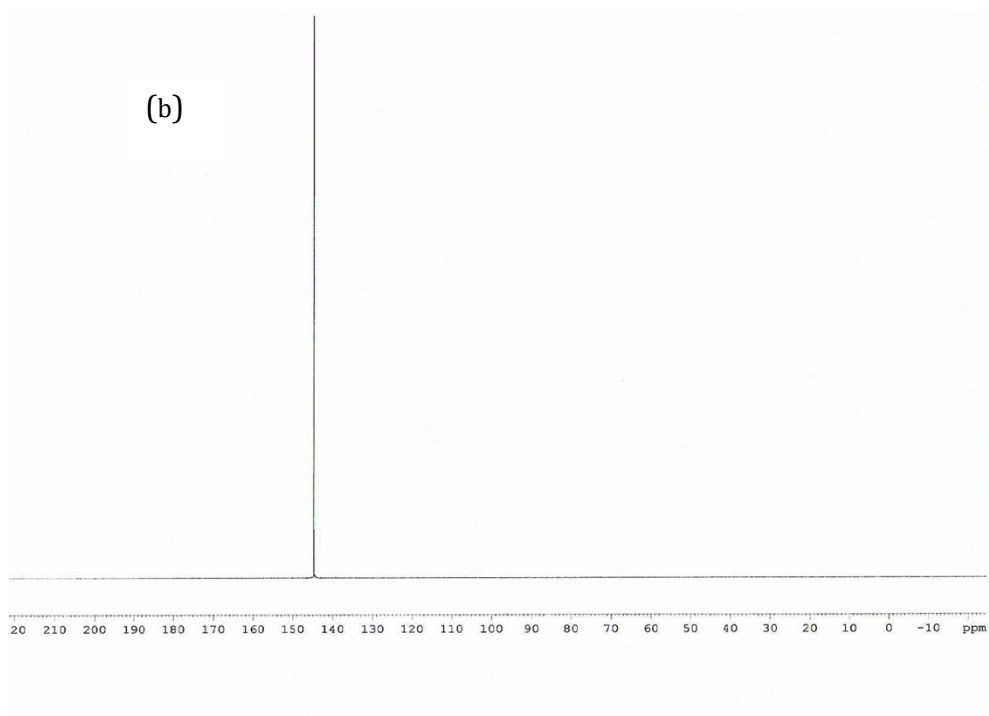

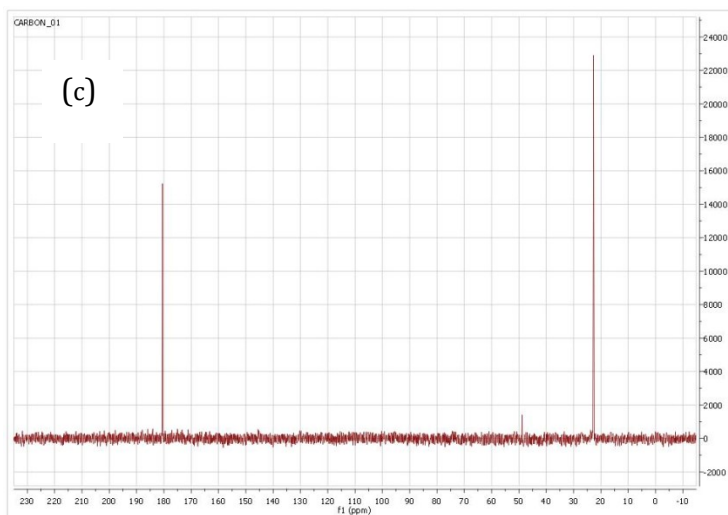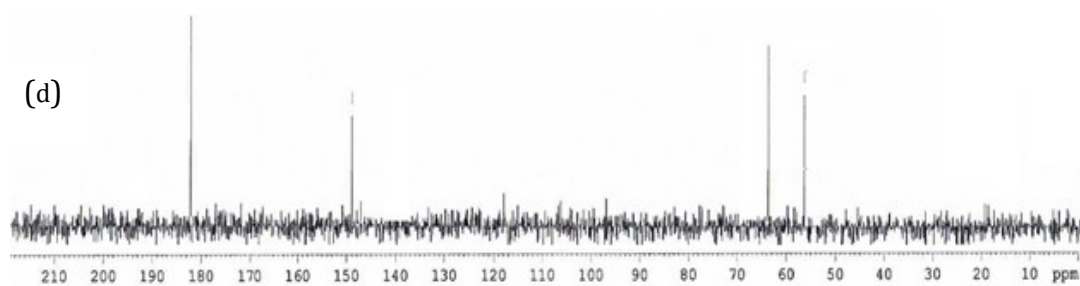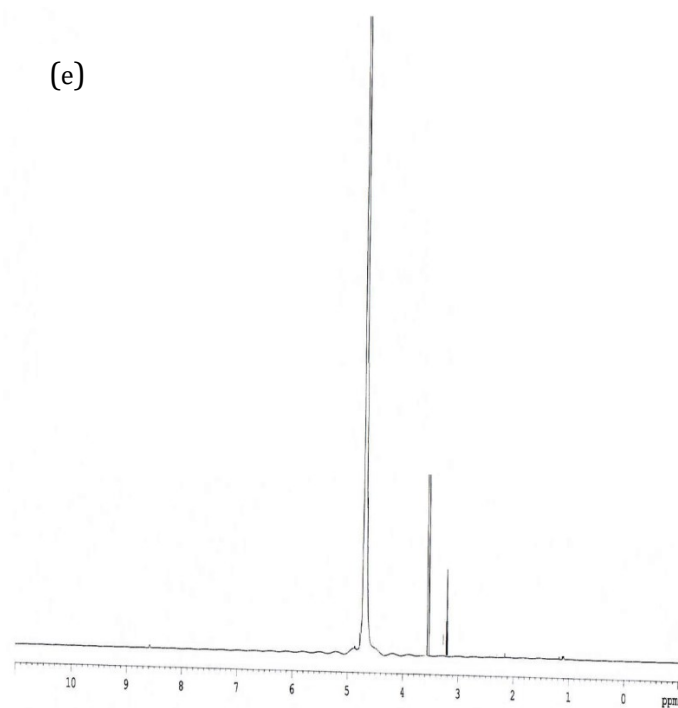

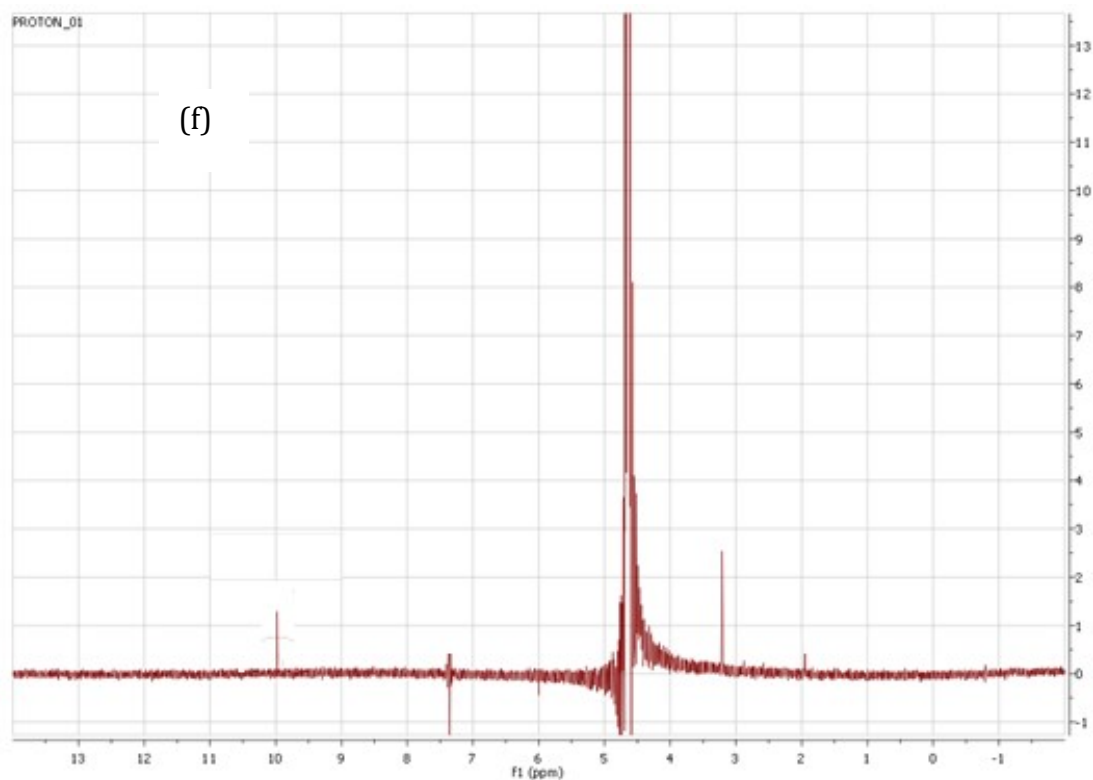

**Fig. S9** (a) <sup>13</sup>C NMR spectra of Na<sub>4</sub>edta, (b) <sup>13</sup>C NMR spectra of pyrazine, (c) <sup>13</sup>C NMR spectrum of the Ru<sup>II</sup>-Ru<sup>II</sup> dimer complex electrochemically generated by reducing the deoxygenated solution of Ru<sup>III</sup>-Ru<sup>III</sup> (0.5 mM) at -0.4V (vs SCE), (d) <sup>13</sup>C NMR spectrum of the Ru<sup>II</sup>-Ru<sup>II</sup> dimer complex generated by reducing the deoxygenated solution of Ru<sup>III</sup>-Ru<sup>III</sup> (2.0 mM) by Eu(II), (e) <sup>1</sup>H NMR spectra of the Na<sub>4</sub>edta and (f) <sup>1</sup>H NMR spectra of the solution of the Ru<sup>II</sup>-Ru<sup>II</sup> dimer complex. NMR spectra were recorded on 600 MHz Bruker Avance II spectrometer using D<sub>2</sub>O, and TMS as standard.

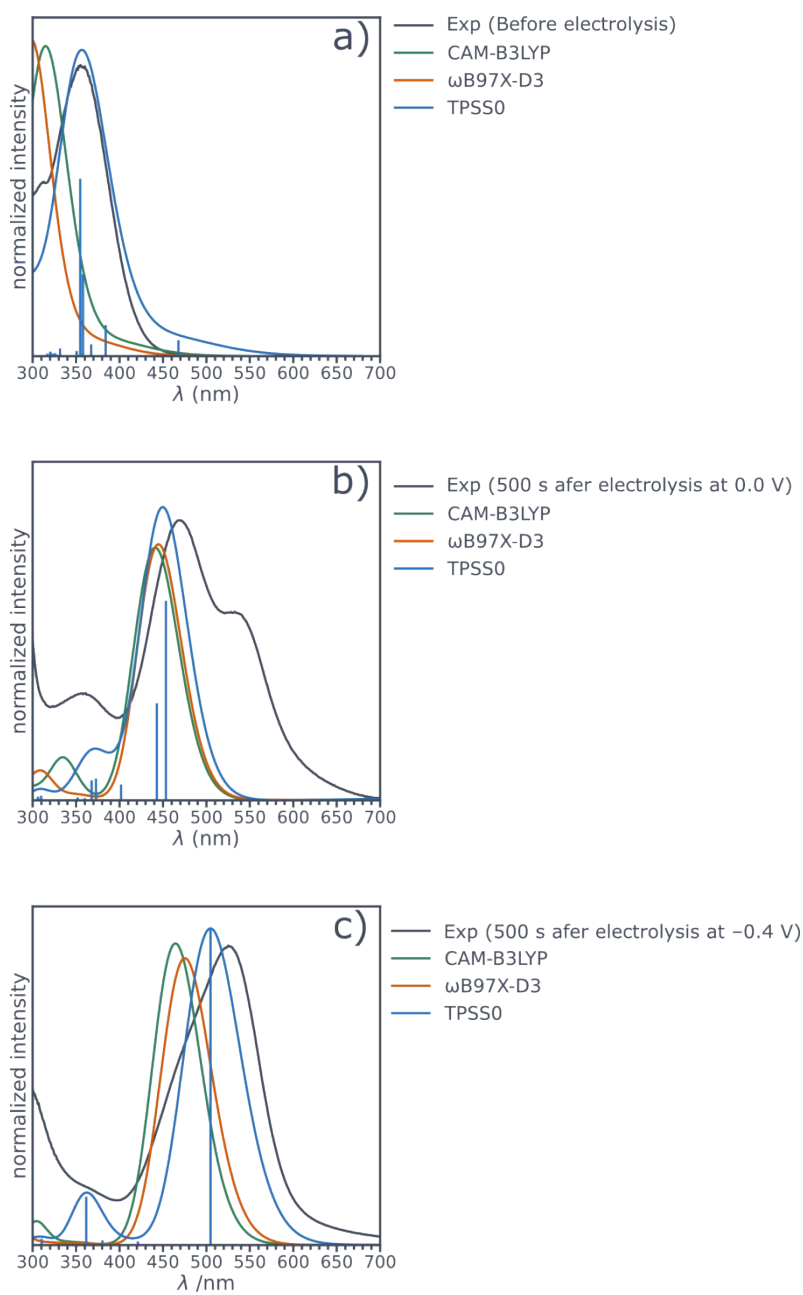

**Fig. S10** Experimental and theoretically computed UV-vis absorption spectra: Ru<sup>III</sup>-Ru<sup>III</sup> (a), Ru<sup>II</sup>-Ru<sup>III</sup> (b) and Ru<sup>II</sup>-Ru<sup>II</sup> (c). The theoretically predicted spectra were simulated by associating a single Gaussian to each computed transition. The transitions computed at the TPSS0 theory level are shown.

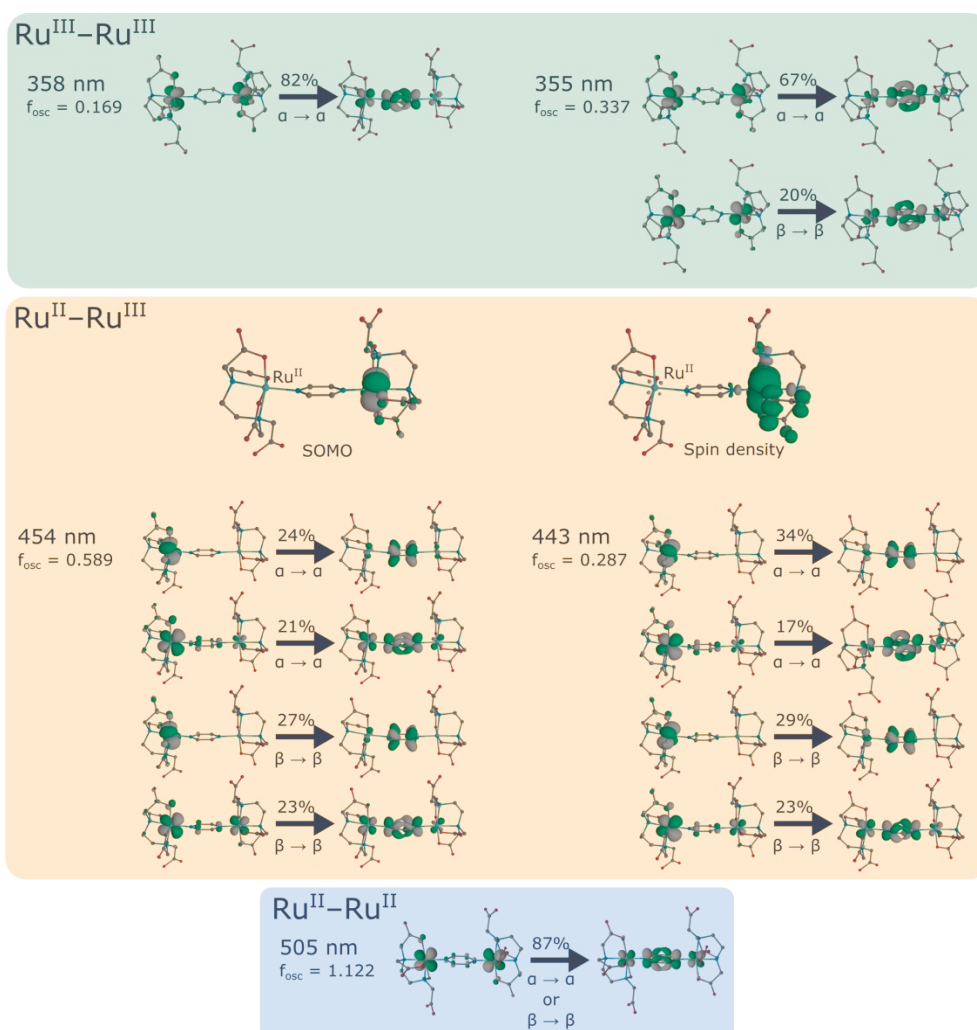

**Fig. S11** Natural transition orbitals (NTOs) from the time-dependent TPSS0 calculations picturing the electronic excited states for Ru<sup>III</sup>-Ru<sup>III</sup>, Ru<sup>II</sup>-Ru<sup>III</sup> and Ru<sup>II</sup>-Ru<sup>II</sup>. For Ru<sup>II</sup>-Ru<sup>III</sup> singly occupied molecular orbital (SOMO) and spin density are shown to distinguish between the Ru<sup>II</sup> and Ru<sup>III</sup> center. All hydrogen atoms were omitted for clarity.

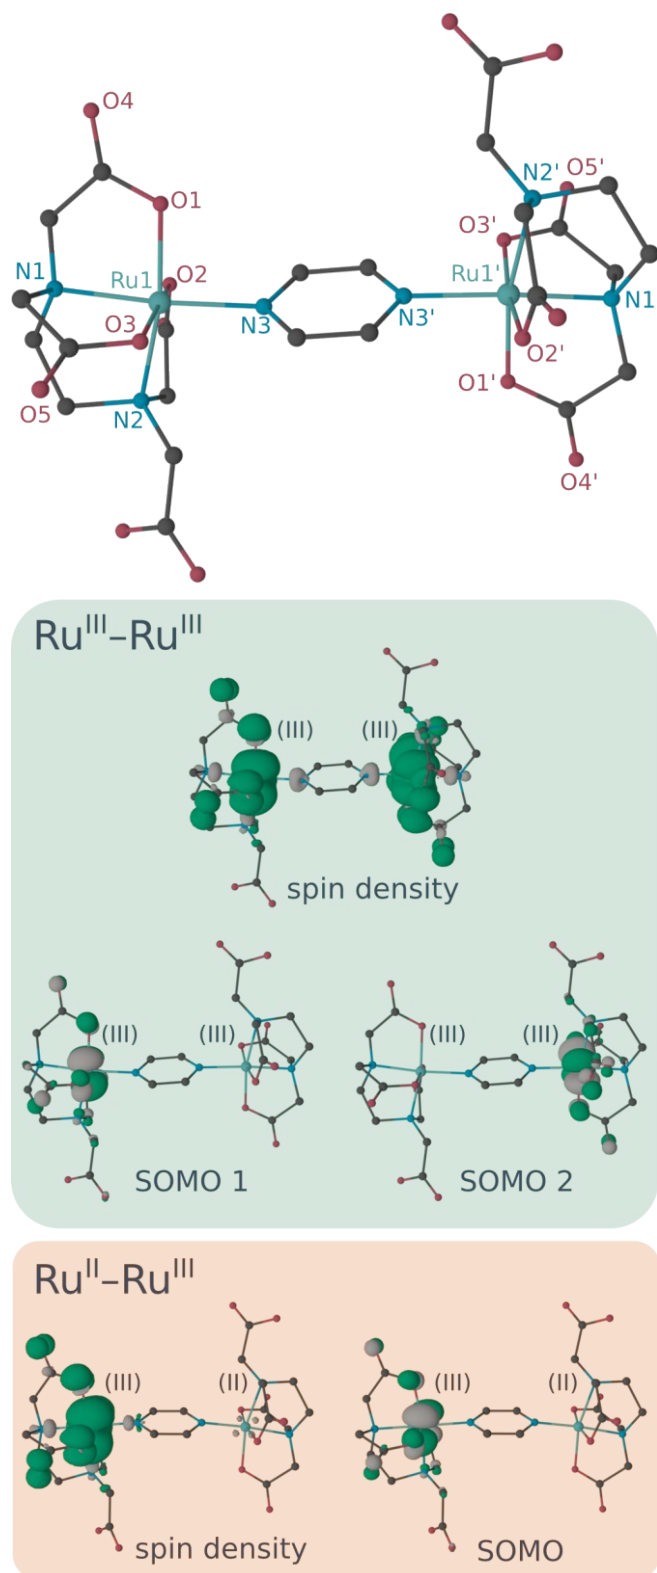

**Fig. S12** Results of the DFT calculations with the hybrid functional TPSS0: molecular model with atom label, the singly occupied molecular orbital (SOMO) isosurfaces contoured at 0.05 a.u. and spin densities isosurfaces contoured at 0.001 a.u.; green for positive and gray for negative. All hydrogen atoms were omitted for clarity.

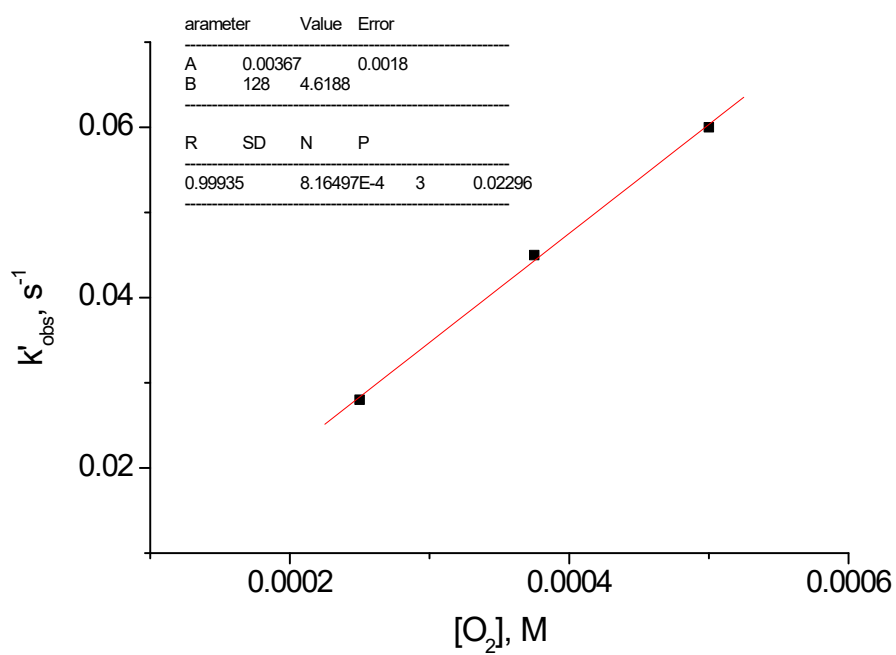

**Fig. S13** Plot of  $k'_{\text{obs}}$  versus  $[\text{O}_2]$  for the reaction of  $\text{Ru}^{\text{II}}\text{-Ru}^{\text{II}}$  with  $\text{O}_2$  at 25 °C and pH 6.0.  $[\text{Ru}^{\text{III}}\text{-Ru}^{\text{III}}] = 0.025\text{mM}$

**Table S1.** Selected bond lengths and the Löwdin spin populations for selected atoms. All calculated at the TPSS0 theory level.

|             |                 | <b>Ru<sup>III</sup>-Ru<sup>III</sup></b> | <b>Ru<sup>II</sup>-Ru<sup>III</sup></b> | <b>Ru<sup>II</sup>-Ru<sup>II</sup></b> |
|-------------|-----------------|------------------------------------------|-----------------------------------------|----------------------------------------|
| Bond length | Ru-N1           | 2.060                                    | 2.072                                   | 2.087                                  |
|             | Ru'-N1'         | 2.060                                    | 2.087                                   | 2.087                                  |
|             | Ru-N2           | 2.170                                    | 2.171                                   | 2.140                                  |
|             | Ru'-N2'         | 2.169                                    | 2.137                                   | 2.140                                  |
|             | Ru-N3           | 2.047                                    | 2.067                                   | 2.016                                  |
|             | Ru-N3'          | 2.053                                    | 1.965                                   | 2.016                                  |
|             | Ru-O1           | 1.960                                    | 1.977                                   | 2.077                                  |
|             | Ru'-O1'         | 1.963                                    | 2.049                                   | 2.077                                  |
|             | Ru-O2           | 2.017                                    | 2.020                                   | 2.094                                  |
|             | Ru'-O2'         | 2.018                                    | 2.083                                   | 2.094                                  |
|             | Ru-O3           | 1.983                                    | 1.996                                   | 2.093                                  |
|             | Ru-O3'          | 1.983                                    | 2.077                                   | 2.093                                  |
|             | Spin population | Ru                                       | 0.834                                   | 0.845                                  |
| Ru'         |                 | 0.834                                    | -0.006                                  | –                                      |
| N1          |                 | -0.009                                   | -0.008                                  | –                                      |
| N1'         |                 | -0.009                                   | 0.000                                   | –                                      |
| N2          |                 | -0.003                                   | -0.003                                  | –                                      |
| N2'         |                 | -0.003                                   | 0.000                                   | –                                      |
| N3          |                 | -0.009                                   | -0.002                                  | –                                      |
| N3'         |                 | -0.009                                   | -0.001                                  | –                                      |
| O1          |                 | 0.061                                    | 0.048                                   | –                                      |
| O1'         |                 | 0.060                                    | 0.000                                   | –                                      |
| O2          |                 | 0.036                                    | 0.034                                   | –                                      |
| O2'         |                 | -0.002                                   | 0.000                                   | –                                      |
| O3          |                 | 0.050                                    | 0.044                                   | –                                      |
| O3'         |                 | 0.050                                    | 0.000                                   | –                                      |
| O4          |                 | 0.026                                    | 0.023                                   | –                                      |
| O4'         |                 | 0.026                                    | 0.000                                   | –                                      |
| O5          |                 | 0.024                                    | 0.024                                   | –                                      |
| O5'         | 0.024           | 0.000                                    | –                                       |                                        |



**S2 Detection of H<sub>2</sub>O<sub>2</sub>**

Detection of H<sub>2</sub>O<sub>2</sub> in the reaction of Ru<sup>II</sup>-Ru<sup>II</sup> with dissolved oxygen was achieved by using Quantofix® peroxides test sticks (Marks) ranging. A solution of Ru<sup>III</sup>-Ru<sup>III</sup> (5 mL; 2.5 mM) was pre-reduced with stoichiometric amount of Eu(II) under argon. Upon completion of the reduction (aliquot of the reacting solution was diluted and checked spectrophotometrically), the resultant solution of Ru<sup>II</sup>-Ru<sup>II</sup> complex was bubbled with O<sub>2</sub> for 15 mins. Then the solution was kept in equilibration for another 15 mins. Evidence of H<sub>2</sub>O<sub>2</sub> formation was obtained by immersing the stick in to the resultant solution by noting the color change in the stick. A blank experiment was performed without purging O<sub>2</sub>, but with argon.

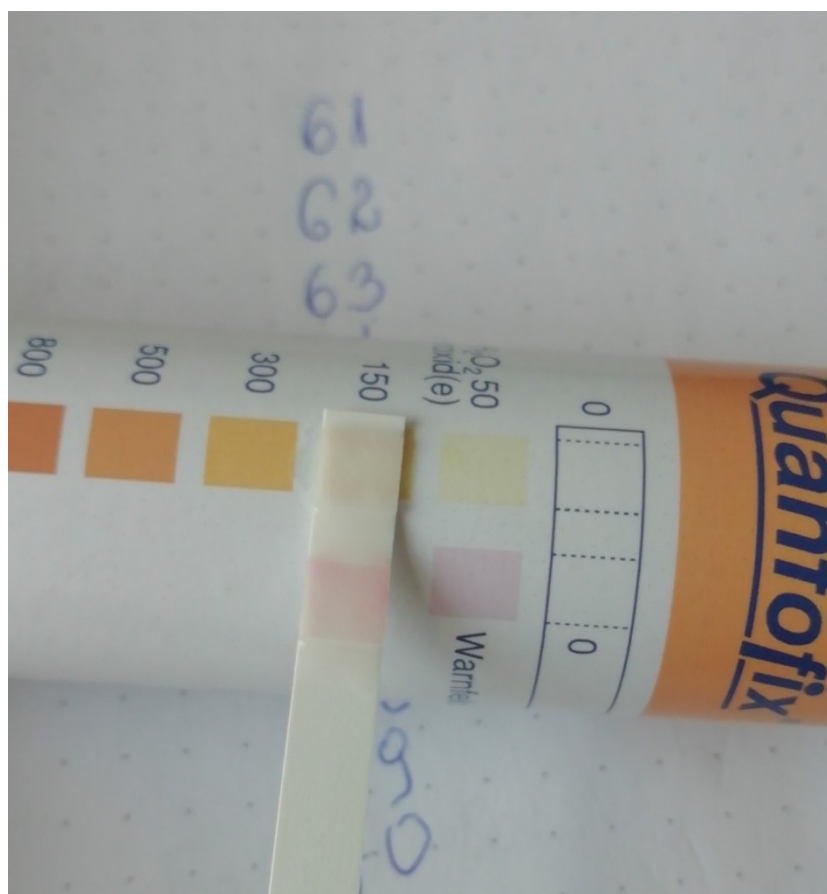

### S3 XYZ coordinates of the optimized structures of the Ru<sup>II</sup>-Ru<sup>II</sup>, Ru<sup>II</sup>-Ru<sup>III</sup> and Ru<sup>III</sup>-Ru<sup>III</sup> complexes

#### Ru<sup>II</sup>-Ru<sup>II</sup>

|    |                   |                   |                   |
|----|-------------------|-------------------|-------------------|
| Ru | 6.16422878145120  | 8.72901521093971  | 4.96947546624866  |
| N  | 7.47457409655345  | 7.08180788809815  | 5.35600305343233  |
| C  | 8.71393927465817  | 7.40812640254069  | 4.61866316285153  |
| C  | 8.47845150466740  | 8.23361432134151  | 3.33741596822492  |
| O  | 9.23654410228699  | 8.05850982951111  | 2.39494122586825  |
| O  | 7.51025435772426  | 9.06932373846292  | 3.40162522569731  |
| C  | 7.66359767276957  | 6.91625195560957  | 6.79672096495895  |
| C  | 8.41894165268971  | 5.70607413671563  | 7.29971878521496  |
| O  | 8.41843818860387  | 5.34563085512419  | 8.44509355444757  |
| O  | 9.12790666981354  | 5.05505711210875  | 6.35828453206693  |
| C  | 6.74462045213496  | 5.92938927271976  | 4.77161439581218  |
| C  | 6.01390763794301  | 6.31315333969197  | 3.49281018653002  |
| C  | 3.89190071668668  | 7.00324949596352  | 4.52211157617407  |
| N  | 5.08600238865450  | 7.41610460854131  | 3.75797347059301  |
| C  | 4.03805424893426  | 7.11949120790169  | 6.05047370378022  |
| O  | 3.35412042996549  | 6.39017540526374  | 6.75290952691165  |
| O  | 4.86113982053408  | 8.01847388269529  | 6.44477685522883  |
| C  | 4.73489645800072  | 8.24581864264294  | 2.59380294793520  |
| C  | 4.24644290456682  | 9.63698647355640  | 3.06793614293523  |
| O  | 3.45062859815270  | 10.23839662658141 | 2.36362043014759  |
| O  | 4.75798264000696  | 10.03471563286505 | 4.17400500406614  |
| N  | 7.09113771729232  | 10.04560519937713 | 6.18315484725532  |
| C  | 8.06496356039428  | 10.88061829855869 | 5.75540759883010  |
| C  | 6.74853067716751  | 10.16017377565885 | 7.48631976923076  |
| N  | 8.33319605366767  | 11.90223991581262 | 7.90053193804275  |
| C  | 7.36180656751481  | 11.06480885989020 | 8.32907855457614  |
| C  | 8.67855546903141  | 11.78498475968829 | 6.59829227465293  |
| Ru | 9.23848550012927  | 13.23905535012153 | 9.10839587161523  |
| N  | 7.91677242190044  | 14.86886592117111 | 8.68786453170567  |
| C  | 6.67204473357540  | 14.53823928485070 | 9.41420769525427  |
| C  | 6.90058873586223  | 13.73043647682046 | 10.70784848928258 |
| O  | 6.12896623515897  | 13.90795651373161 | 11.63879165772570 |
| O  | 7.87860568777179  | 12.90477578379885 | 10.66542655658308 |
| C  | 7.74316685790656  | 15.01693564921893 | 7.24323933693853  |
| C  | 6.98423033097146  | 16.21534121032465 | 6.71811863730529  |
| O  | 6.99699902595477  | 16.56451709002721 | 5.56934689338982  |
| O  | 6.25660620154943  | 16.86884707661426 | 7.64342533853246  |
| C  | 8.62823627572181  | 16.03505903718044 | 9.26764364513598  |
| C  | 9.34842449862223  | 15.67286631615898 | 10.55852592003533 |
| C  | 11.48809241126254 | 14.99393500151506 | 9.55844322112858  |
| N  | 10.29068163649781 | 14.57712506013787 | 10.31533998978649 |
| C  | 11.36005676040952 | 14.85637879950390 | 8.03020191735513  |
| O  | 12.04457387062788 | 15.58344477165680 | 7.32599761523964  |
| O  | 10.55056981873165 | 13.94401106185764 | 7.63848740641538  |
| C  | 10.63906166364232 | 13.76492161418470 | 11.49261831125810 |
| C  | 11.14613852496365 | 12.37335049990654 | 11.03995683372788 |
| O  | 11.94229235886914 | 11.78924068307656 | 11.75838508565291 |
| O  | 10.64813408778907 | 11.95647635320625 | 9.93478469872404  |
| H  | 9.32537743649601  | 8.03211943330329  | 5.27681537181830  |
| H  | 9.28469775112169  | 6.51020130126861  | 4.37305489520665  |
| H  | 6.67763399908259  | 6.91877309559144  | 7.27060484046797  |
| H  | 8.18528703165380  | 7.79781755951324  | 7.17920744266472  |
| H  | 9.57537293355746  | 4.33281685001377  | 6.81599037191451  |
| H  | 7.43417711386673  | 5.10036308951840  | 4.57723519543189  |
| H  | 6.01906325626634  | 5.59585746913493  | 5.51894402465642  |
| H  | 6.72491638117629  | 6.64388467108252  | 2.73357891851901  |
| H  | 5.48851415089713  | 5.42964644622511  | 3.09970941971563  |
| H  | 3.58775467294074  | 5.98357067107264  | 4.26116153484310  |
| H  | 3.07496888276010  | 7.67476400288572  | 4.24712766620033  |
| H  | 5.64742223282526  | 8.40520701376785  | 2.01485658817005  |
| H  | 3.96854183170623  | 7.77698649113786  | 1.96536580712873  |
| H  | 8.32944787683481  | 10.79904061045510 | 4.70785913224578  |
| H  | 5.95513768536867  | 9.50258528341833  | 7.82427083560073  |
| H  | 7.09537933426895  | 11.14836337739871 | 9.37596993722894  |
| H  | 9.47075788876329  | 12.44380575974795 | 6.25994311592417  |
| H  | 6.07523584583799  | 13.90006277586799 | 8.75623551244367  |
| H  | 6.08893551041313  | 15.43288033366281 | 9.64213734967469  |
| H  | 8.73453080231344  | 15.01723486675090 | 6.78077517365362  |

|   |                   |                   |                   |
|---|-------------------|-------------------|-------------------|
| H | 7.23280439331561  | 14.12719407960356 | 6.86443594737563  |
| H | 5.80848166360320  | 17.58217156193822 | 7.17257715480234  |
| H | 7.92814124400838  | 16.85901588472490 | 9.44511030343269  |
| H | 9.35883767273817  | 16.36786830520532 | 8.52488571868714  |
| H | 8.63258974128886  | 15.34254357057486 | 11.31335391965129 |
| H | 9.86009157047485  | 16.56606885139530 | 10.94784314295847 |
| H | 11.77784888588551 | 16.02029859965938 | 9.80933269614561  |
| H | 12.30967844678146 | 14.33555755641599 | 9.85085139808372  |
| H | 9.72280909479700  | 13.60301557205604 | 12.06498310991241 |
| H | 11.39462438917019 | 14.24902851368160 | 12.12255266093454 |

## Ru<sup>II</sup>–Ru<sup>III</sup>

|    |                   |                   |                   |
|----|-------------------|-------------------|-------------------|
| Ru | 6.04059251594548  | 8.70821131281894  | 4.85366619396804  |
| N  | 7.46687289572645  | 7.20629660770129  | 5.50393104108252  |
| C  | 8.76150320437091  | 7.58235702454834  | 4.88550710081517  |
| C  | 8.58563524452037  | 8.30510590706391  | 3.55064534154476  |
| O  | 9.44709765722278  | 8.24249748841599  | 2.70467576546294  |
| O  | 7.47841802362724  | 8.97495342218053  | 3.46023181103827  |
| C  | 7.54088096695198  | 7.12283934025817  | 6.97103105352089  |
| C  | 8.33664450452214  | 5.99093332649571  | 7.58652372457622  |
| O  | 8.23435238019401  | 5.67481322798249  | 8.73607385119653  |
| O  | 9.18804918639002  | 5.38779200489869  | 6.74037977192245  |
| C  | 6.89476455706107  | 5.95675650152123  | 4.92524514484582  |
| C  | 6.24727535373671  | 6.18763330030075  | 3.56631312974848  |
| C  | 3.98938616010477  | 6.76563743662290  | 4.37498298313311  |
| N  | 5.20585721492322  | 7.22590782730580  | 3.67020495646183  |
| C  | 4.03350365940172  | 7.01154863378451  | 5.88625474048793  |
| O  | 3.38564805192333  | 6.32326955967121  | 6.63602438600465  |
| O  | 4.78895969868458  | 8.01642005319861  | 6.24617474725760  |
| C  | 4.88112492653348  | 7.93405331728980  | 2.41724497261550  |
| C  | 4.32518739767234  | 9.33410512445127  | 2.74118821858848  |
| O  | 3.53869157488847  | 9.86195995484625  | 1.99560623346636  |
| O  | 4.81043106181091  | 9.87131719943334  | 3.83298673671656  |
| N  | 6.82342526270319  | 10.19073265001002 | 6.06237402398309  |
| C  | 7.73718488823305  | 11.06958972390538 | 5.60378446357207  |
| C  | 6.49667227547008  | 10.28611656006914 | 7.36680068089402  |
| N  | 8.04756837835443  | 12.06162330260637 | 7.75703351017005  |
| C  | 7.09975278705923  | 11.19680219741095 | 8.20585399734195  |
| C  | 8.34025502818194  | 11.98973601309047 | 6.43061389955335  |
| Ru | 9.08331704796846  | 13.22597778208518 | 8.95386483323377  |
| N  | 7.92460476518450  | 15.01431648624301 | 8.79826474519833  |
| C  | 6.70758570519537  | 14.74488318009081 | 9.59565881294830  |
| C  | 6.92193412018043  | 13.76477424098742 | 10.76712448539981 |
| O  | 6.20785128636700  | 13.88073622016776 | 11.74627032205973 |
| O  | 7.82167320909170  | 12.86764810596139 | 10.57188197801125 |
| C  | 7.64194627531386  | 15.30043672718110 | 7.39125914304415  |
| C  | 6.84853747577302  | 16.53862993888757 | 7.03351155311862  |
| O  | 6.50973980576581  | 16.79660947764261 | 5.91195426893888  |
| O  | 6.54913896788027  | 17.33592625568457 | 8.07190882037185  |
| C  | 8.79685081031231  | 16.05069288007670 | 9.41319885887576  |
| C  | 9.57239431904532  | 15.49346376290239 | 10.59629803324596 |
| C  | 11.53242885787601 | 14.70741092664541 | 9.33682060990878  |
| N  | 10.36671614898449 | 14.33551632290364 | 10.16893802724034 |
| C  | 11.25014469604433 | 14.72813312824534 | 7.82522550480521  |
| O  | 11.91260348626143 | 15.46136955646654 | 7.11398476274920  |
| O  | 10.32742307608326 | 13.91793434112459 | 7.44090978725231  |
| C  | 10.73269985022136 | 13.39037136725832 | 11.23877285280562 |
| C  | 11.04027095672814 | 12.00830236189531 | 10.62067403563392 |
| O  | 11.81612295945910 | 11.26464858639053 | 11.18821614379405 |
| O  | 10.40284464372652 | 11.76620587917768 | 9.52648609122437  |
| H  | 9.25883840097572  | 8.28337266736096  | 5.56105452055386  |
| H  | 9.40863144391186  | 6.71473000966104  | 4.76178882618697  |
| H  | 6.52632986280139  | 7.06404641638822  | 7.36901593815823  |
| H  | 7.97001554600186  | 8.05466536296068  | 7.34757010159930  |
| H  | 9.66758630081919  | 4.72259606618670  | 7.25109860455654  |
| H  | 7.67271241326755  | 5.19298409777641  | 4.84530111857430  |
| H  | 6.14432557248250  | 5.59081805793478  | 5.63161623454490  |
| H  | 6.98502925050393  | 6.52740076847271  | 2.83833453275590  |
| H  | 5.82626966664619  | 5.24271518624255  | 3.20128695935275  |
| H  | 3.79090889564645  | 5.70873031933723  | 4.17910040965144  |
| H  | 3.14033507742623  | 7.33979766845265  | 3.99516437370797  |
| H  | 5.81080370699523  | 8.08184763190614  | 1.86347475580325  |
| H  | 4.16630540058735  | 7.38174626271504  | 1.80169431383252  |
| H  | 7.98546319750357  | 11.00800113072863 | 4.55141593058015  |

|   |                   |                   |                   |
|---|-------------------|-------------------|-------------------|
| H | 5.73977473035046  | 9.59903527367996  | 7.72760329019923  |
| H | 6.87146834436561  | 11.25497131102151 | 9.26336236116864  |
| H | 9.10581518789174  | 12.67300065609841 | 6.08015345588090  |
| H | 5.98393002080030  | 14.26542557595597 | 8.92998285824807  |
| H | 6.26154716171624  | 15.66830833858690 | 9.97076753057003  |
| H | 8.59500344692777  | 15.33688721071179 | 6.85364124692125  |
| H | 7.09604321339540  | 14.45400667891272 | 6.96991408120859  |
| H | 6.04287711036681  | 18.07569062078912 | 7.71295850321535  |
| H | 8.20024052589510  | 16.91281258778146 | 9.72266651562466  |
| H | 9.49335051447299  | 16.38562443365312 | 8.64015458627608  |
| H | 8.88877237872105  | 15.16351395783502 | 11.38092304580694 |
| H | 10.21082330066786 | 16.28244921945314 | 11.01672975591327 |
| H | 11.94397041546155 | 15.67270275099092 | 9.64685558753017  |
| H | 12.30576401361278 | 13.95069895341560 | 9.48926302632711  |
| H | 9.86175115833979  | 13.26801544367501 | 11.88628232493109 |
| H | 11.58930042176610 | 13.73872879541178 | 11.82482906048919 |

### Ru<sup>III</sup>–Ru<sup>III</sup>

|    |                   |                   |                   |
|----|-------------------|-------------------|-------------------|
| Ru | 6.35313631586340  | 8.66391131267241  | 4.95145989651518  |
| N  | 7.39842729655714  | 6.82548043660850  | 5.43563403892326  |
| C  | 8.75459509343066  | 6.95822006770035  | 4.84774447991772  |
| C  | 8.78886011732661  | 7.86895701430347  | 3.61811168876919  |
| O  | 9.65447178707937  | 7.73880381469674  | 2.78938746783295  |
| O  | 7.85616544116640  | 8.77679150969179  | 3.61162102685183  |
| C  | 7.45000301195156  | 6.60806277494058  | 6.88958614434178  |
| C  | 8.14527767657485  | 5.37125889484310  | 7.42386757096349  |
| O  | 8.34845281290625  | 5.21299657789065  | 8.59165089244906  |
| O  | 8.49405228825157  | 4.47986777451482  | 6.48700429843910  |
| C  | 6.58178456139145  | 5.78257051450832  | 4.74304676860877  |
| C  | 6.00867213758379  | 6.29347826047418  | 3.43107520127116  |
| C  | 3.94126908960143  | 7.24138928491535  | 4.38814438021103  |
| N  | 5.21517116449464  | 7.51216943515382  | 3.67710199797245  |
| C  | 4.08637436135169  | 7.31607350030394  | 5.90981386768589  |
| O  | 3.39895655325220  | 6.65028711025013  | 6.63977327074851  |
| O  | 4.99809523981934  | 8.17258516399448  | 6.31381169020809  |
| C  | 5.01914227135413  | 8.39422258411945  | 2.50761416273430  |
| C  | 4.79722492538568  | 9.84456031505731  | 2.97311796961954  |
| O  | 4.14572376864559  | 10.60943195093889 | 2.31589567081081  |
| O  | 5.41339934153184  | 10.15735054223894 | 4.09763150722224  |
| N  | 7.30583750942130  | 9.96708020831769  | 6.21002046593894  |
| C  | 8.15913905843690  | 10.87245583871961 | 5.70915633206999  |
| C  | 6.97275893604316  | 10.05832458368358 | 7.50627391626740  |
| N  | 8.34421256524656  | 11.96724143196993 | 7.80539372955484  |
| C  | 7.50086752752226  | 11.05324015439830 | 8.30866983205702  |
| C  | 8.67711386391494  | 11.87627503419798 | 6.50897309846132  |
| Ru | 9.24984506892566  | 13.36204764187668 | 9.00985037243418  |
| N  | 7.82731328310871  | 14.98502573301259 | 8.79166189973958  |
| C  | 6.62549705205350  | 14.60112857178103 | 9.57083479216053  |
| C  | 6.93961316654269  | 13.65082640937407 | 10.72771484643521 |
| O  | 6.20298798584021  | 13.58802995009184 | 11.68007212932098 |
| O  | 8.00107185187388  | 12.92358565698417 | 10.53305531986768 |
| C  | 7.50713872793376  | 15.21966402318883 | 7.37430565179121  |
| C  | 6.50450664222360  | 16.30128208072120 | 7.02372673405015  |
| O  | 6.03946345044000  | 16.40826799600355 | 5.92746609011551  |
| O  | 6.20401829677506  | 17.12722030480898 | 8.03566157887037  |
| C  | 8.54848342483577  | 16.14054759337945 | 9.40780503841948  |
| C  | 9.39001475320030  | 15.70886503209213 | 10.59847141930972 |
| C  | 11.43057346103375 | 15.17993817009297 | 9.31724937888094  |
| N  | 10.34003082688422 | 14.66111714581060 | 10.18013447316386 |
| C  | 11.08140392638884 | 15.13414899062165 | 7.82783703248175  |
| O  | 11.54384410940587 | 15.92639070017161 | 7.04912960970171  |
| O  | 10.26813519002770 | 14.15296118763271 | 7.50339423698572  |
| C  | 10.85758416844812 | 13.79310869960438 | 11.25772063602942 |
| C  | 11.28587201475845 | 12.43728375396283 | 10.66721408508022 |
| O  | 12.16285810715034 | 11.79200400375535 | 11.17386091745543 |
| O  | 10.58544888068887 | 12.05737966931832 | 9.61576072880135  |
| H  | 9.39729711537181  | 7.42810546485601  | 5.59715317256758  |
| H  | 9.17724273061605  | 5.98215987731220  | 4.60763022301393  |
| H  | 6.42927988740467  | 6.60717613049004  | 7.28074966567713  |
| H  | 7.95441612100675  | 7.46022025521947  | 7.34752744490607  |
| H  | 8.92261448555191  | 3.73898139045422  | 6.93661745234744  |
| H  | 7.18508573104398  | 4.88968350195620  | 4.57083812062781  |
| H  | 5.77231995541869  | 5.50054623004714  | 5.42143620237592  |

|                     |                   |                   |
|---------------------|-------------------|-------------------|
| H 6.80590768823180  | 6.55198944832201  | 2.73242862286845  |
| H 5.39638047797343  | 5.51078735412384  | 2.96881695465027  |
| H 3.52474206566199  | 6.27426108088059  | 4.09832446584162  |
| H 3.22228372269699  | 8.01459697110592  | 4.10507200337544  |
| H 5.94024931598064  | 8.38672883738720  | 1.92022839121457  |
| H 4.18415705478777  | 8.07163139778023  | 1.88150452648369  |
| H 8.40876992060560  | 10.77798117464341 | 4.65884913061838  |
| H 6.25261230543414  | 9.33820882765822  | 7.87763421045214  |
| H 7.26631344577586  | 11.13533275774318 | 9.36339282057800  |
| H 9.37214281603583  | 12.61823061140849 | 6.13208119549657  |
| H 5.95107790594276  | 14.05984633528469 | 8.90154612697745  |
| H 6.09582837202850  | 15.48125160164179 | 9.93686078807172  |
| H 8.43475979456066  | 15.43423752343946 | 6.83740316733671  |
| H 7.11780103619230  | 14.29311664480847 | 6.95027564730089  |
| H 5.56750577118262  | 17.77392063111738 | 7.70207814689897  |
| H 7.83398634778976  | 16.90871334113968 | 9.70776262770173  |
| H 9.18633210909041  | 16.57573879120138 | 8.63451105679876  |
| H 8.76256867840909  | 15.29344799187497 | 11.38894463548687 |
| H 9.91680744695859  | 16.57747222414387 | 11.00981413907221 |
| H 11.71351929460905 | 16.19515713146003 | 9.60408548384691  |
| H 12.30545951068676 | 14.53857445069909 | 9.45173416683208  |
| H 10.04034511825685 | 13.59563337274498 | 11.95543798023714 |
| H 11.69385467004880 | 14.25067924366372 | 11.79133309280088 |
